# Supplementary material for: Deficiency of PPP6C protects TNF-induced necroptosis through activation of TAK1
Source: PubMed Central journal article supplement (PMC9288536; doi:10.1038/s41419-022-05076-1), 2022-07-16

# Uncropped blot images of the indicated Figures (page 1 of 5)

Fig. 1E

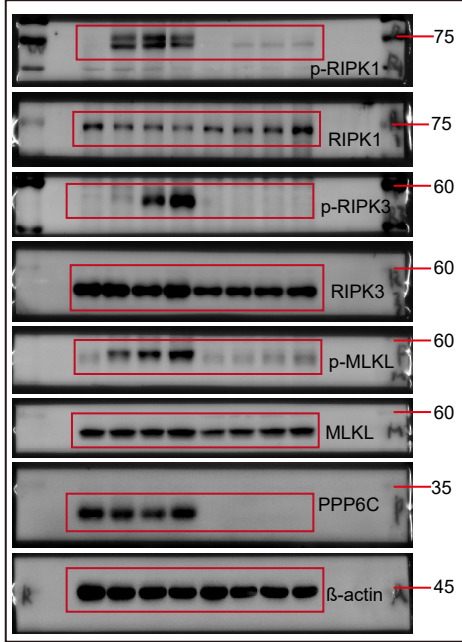

Fig. 1F

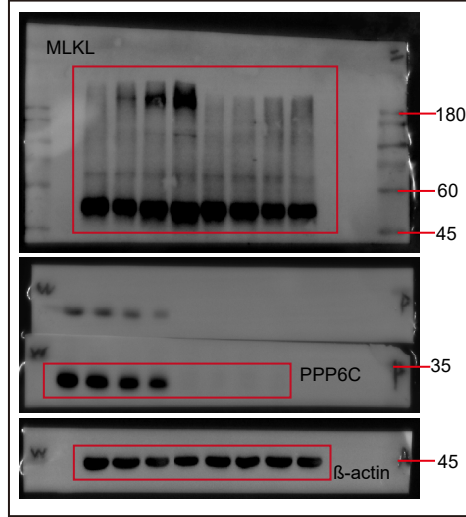

Fig. 1G

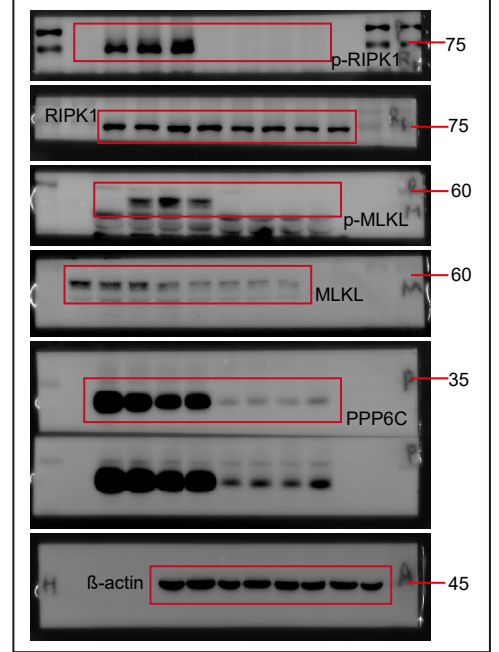

Fig. 1I

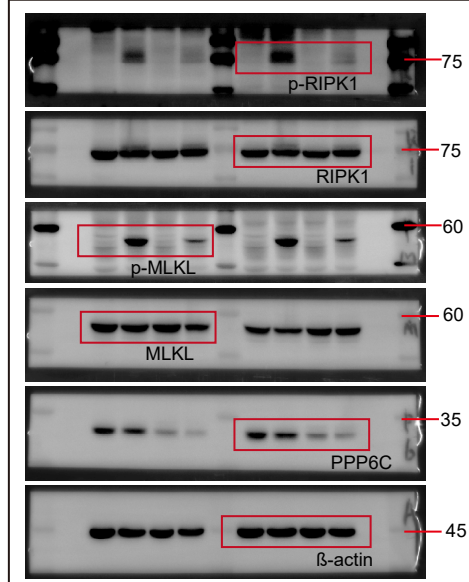

Fig. S1F

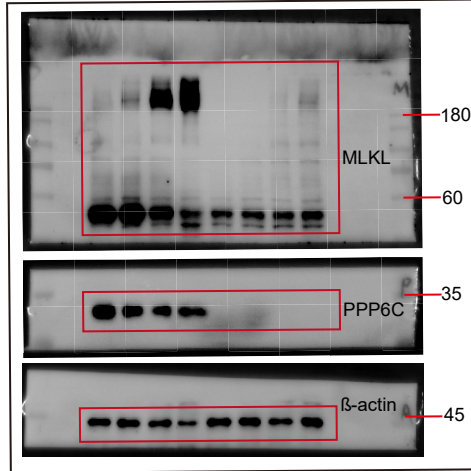

Fig. 2H

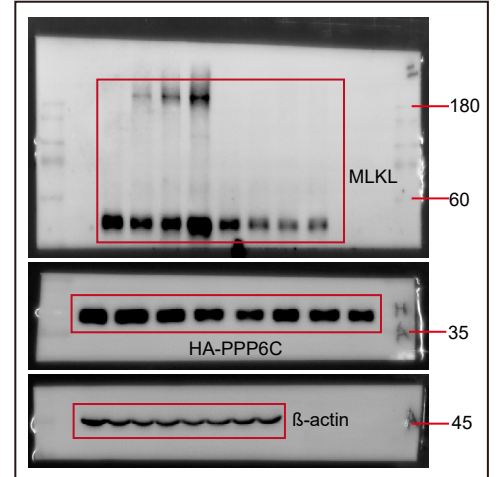

Fig. 2B

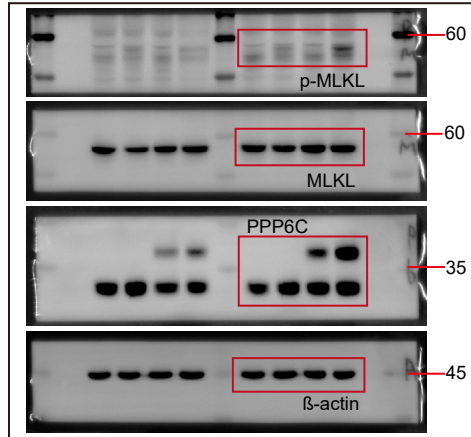

Fig. 2I

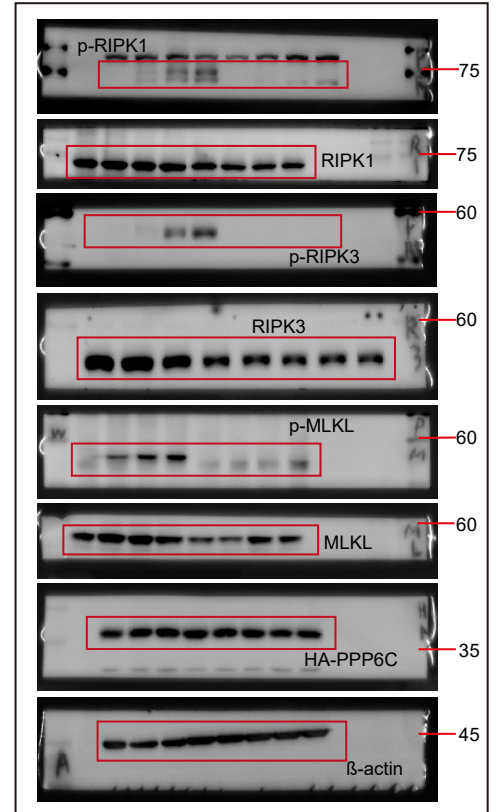

Fig. 2F

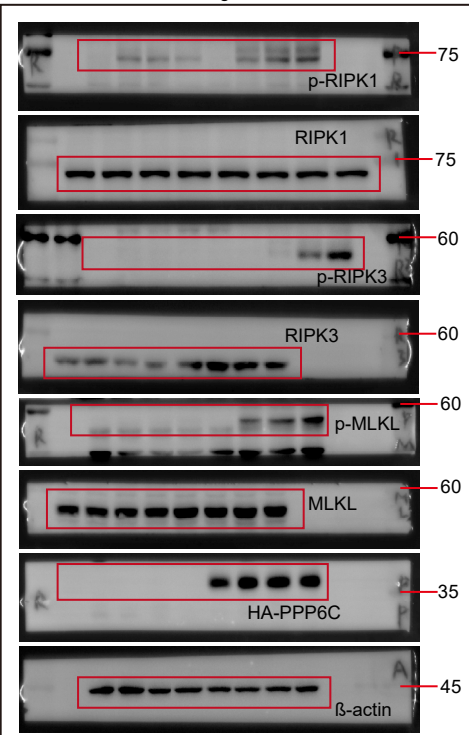

Fig. 2G

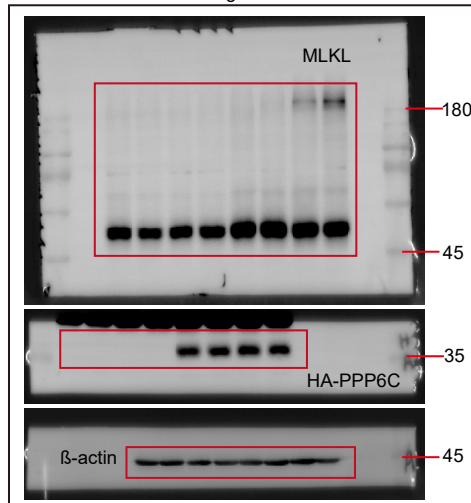

Fig. S2A

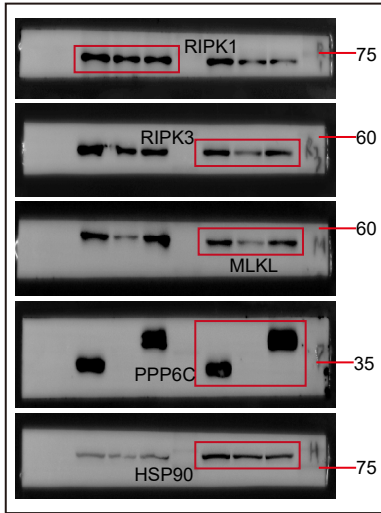

Fig. S2C

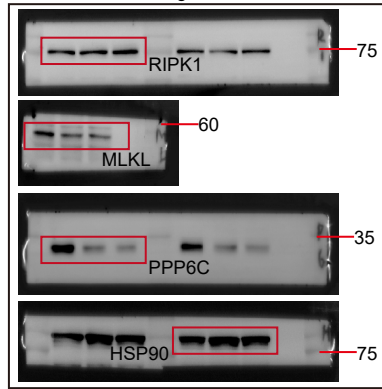

Fig. 3G

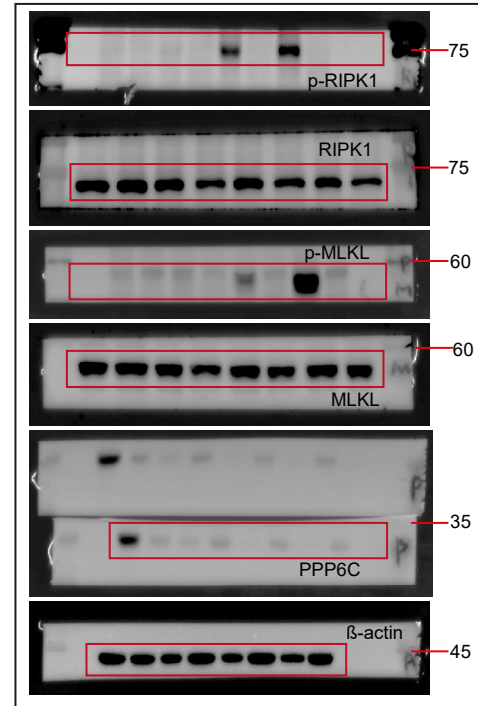

Fig. 3J

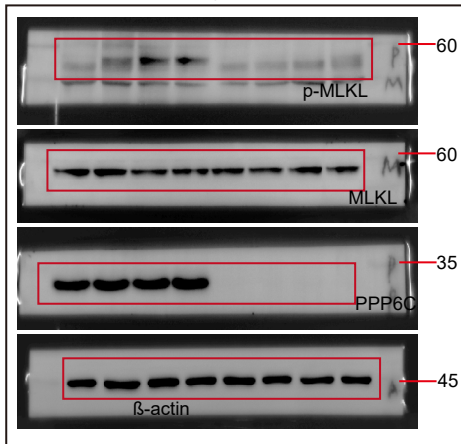

Fig. S3C

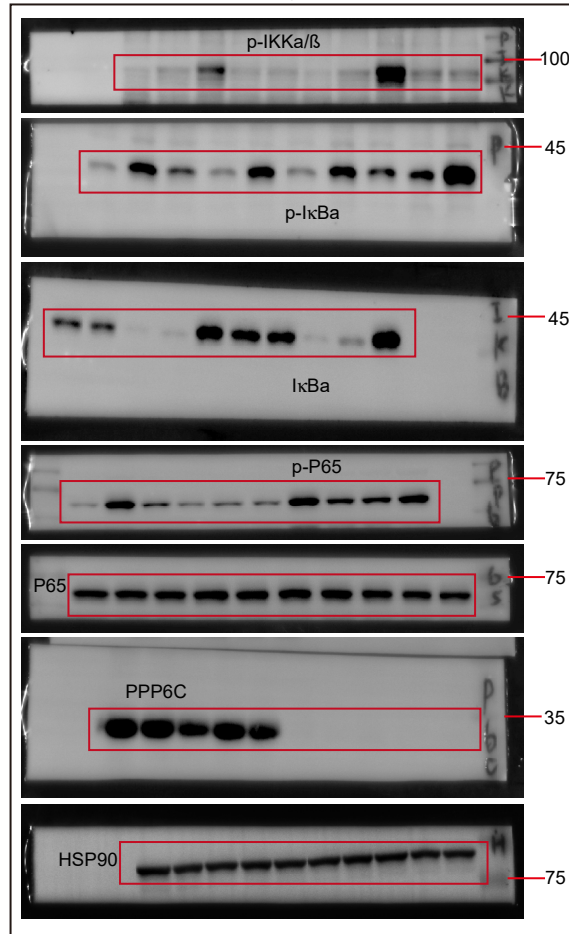

Fig. S3G

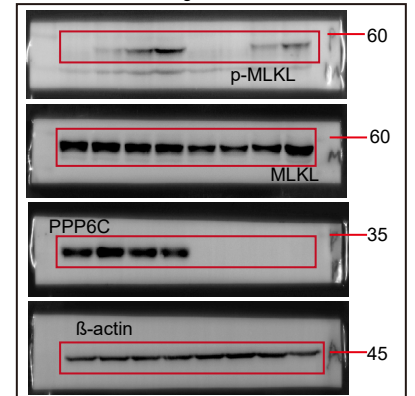

Fig. S3F

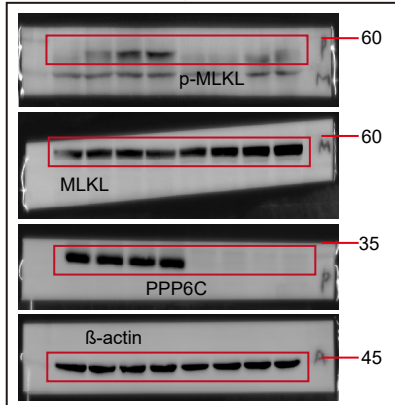

Fig. S3E

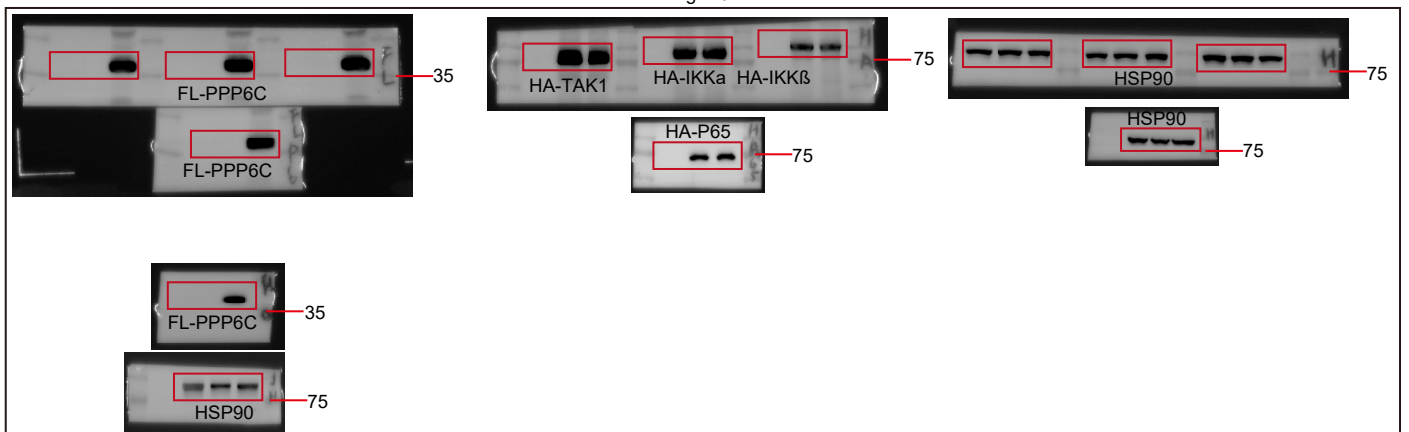

Uncropped blot images of the indicated Figures (page 3 of 5)

Fig. S3H

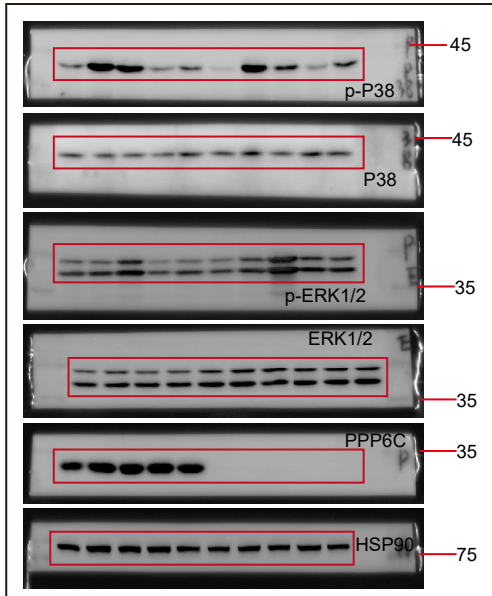

Fig. 4C

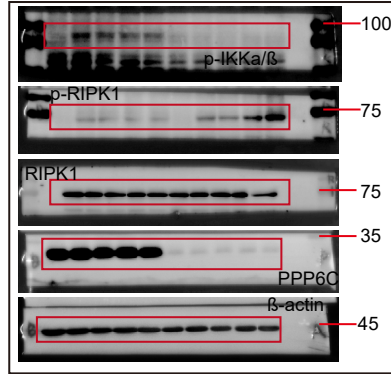

Fig. 4D

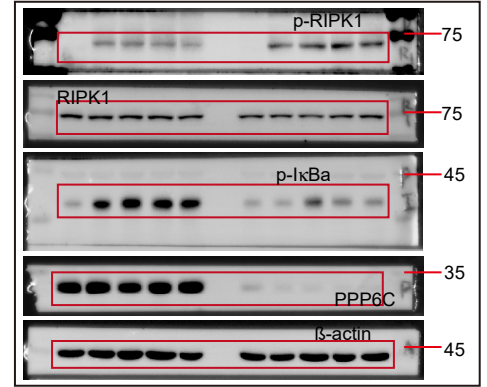

Fig. 4E

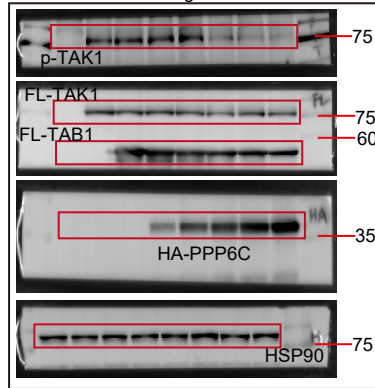

Fig. 4F

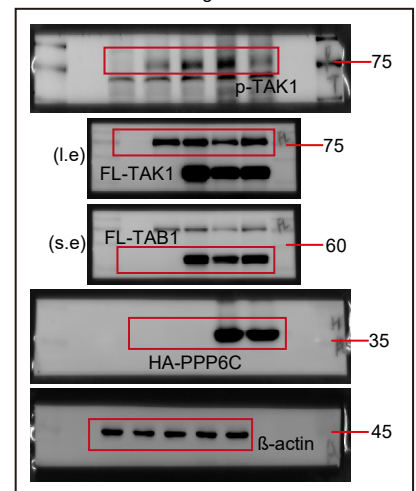

Fig. 4A

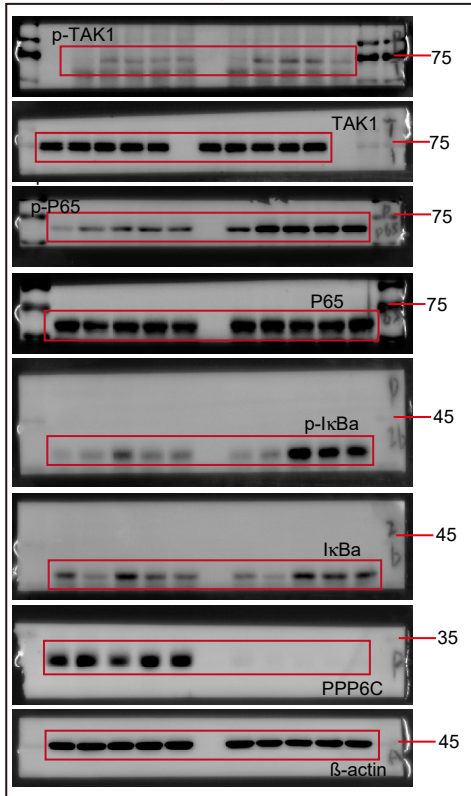

Fig. 4G

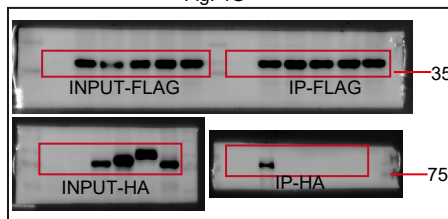

Fig. 4H

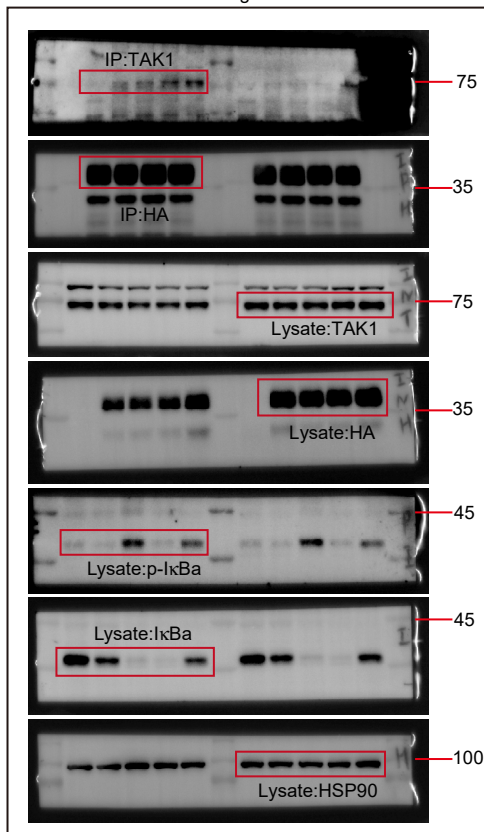

Fig. 4I

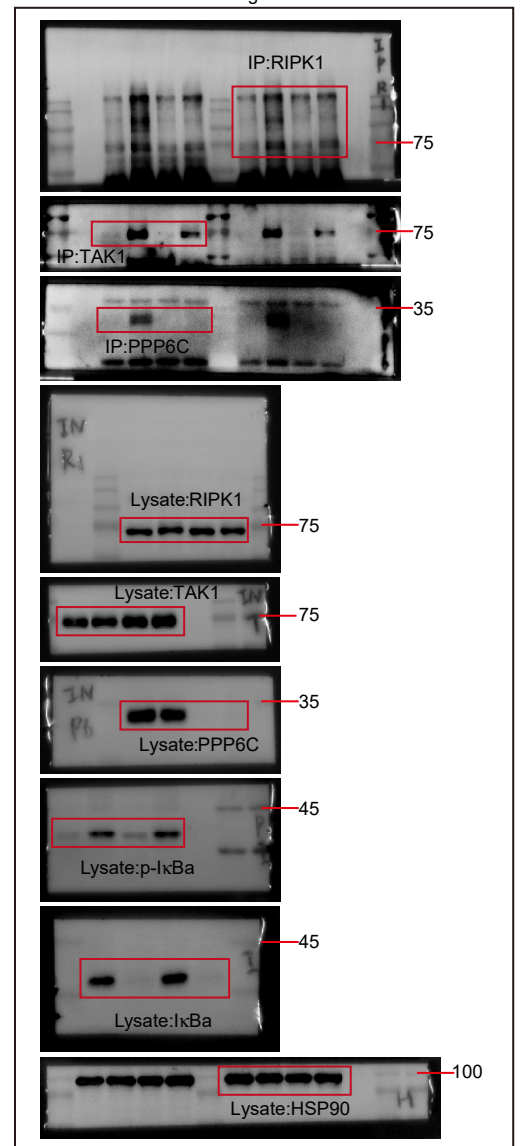

Fig. 4B

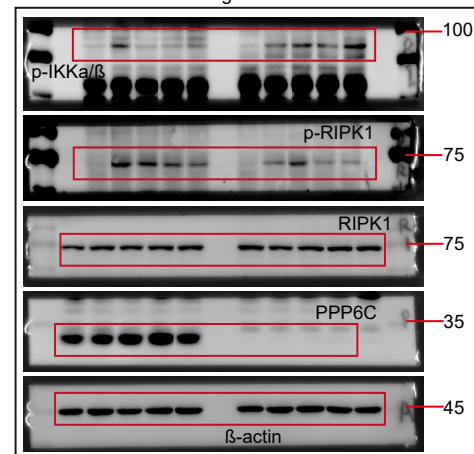

Uncropped blot images of the indicated Figures (page 4 of 5)

Fig. 4J

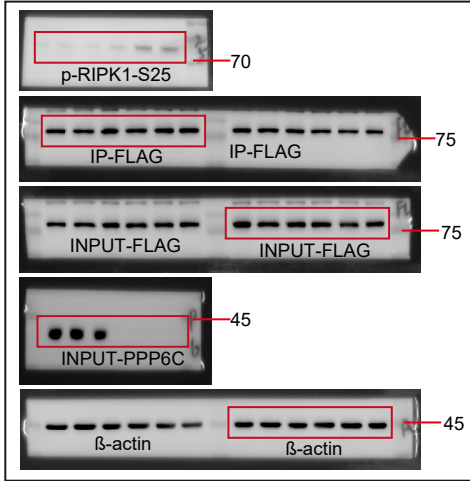

Fig. S4A

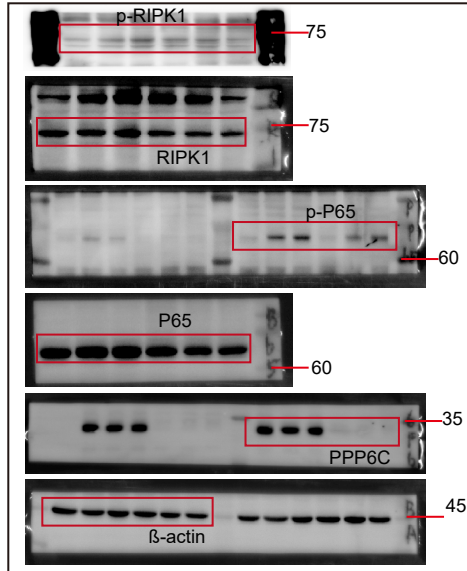

Fig. S4B

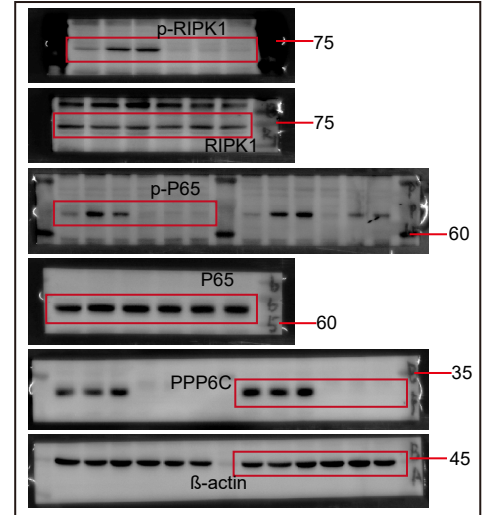

Fig. S4C

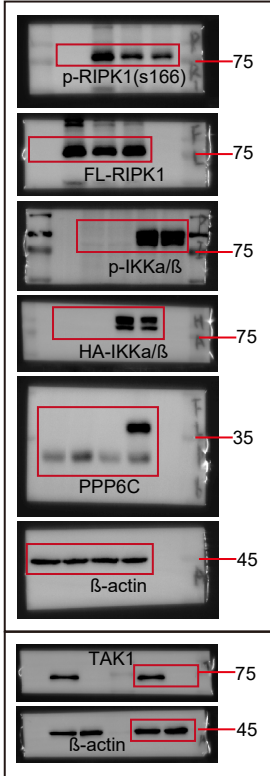

Fig. 5C

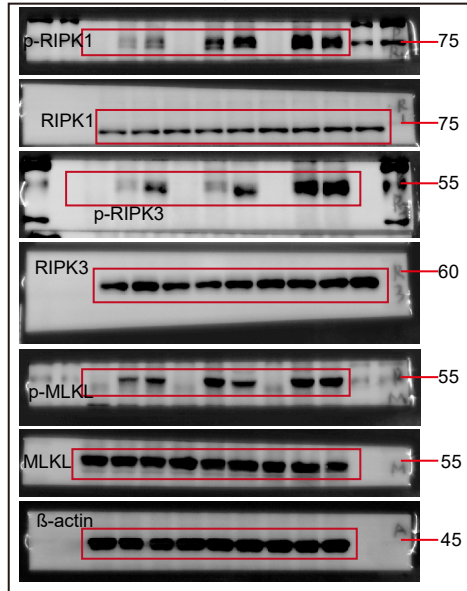

Fig. 5F

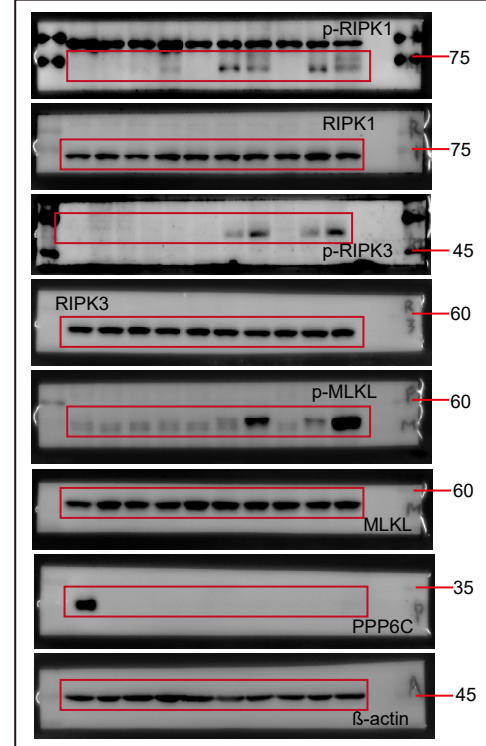

Fig. 5I

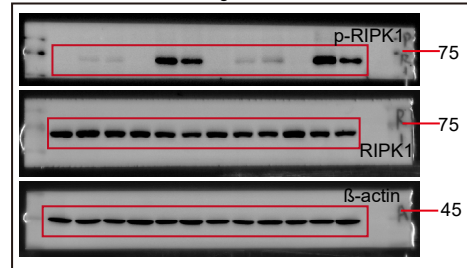

Uncropped blot images of the indicated Figures (page 5 of 5)

Fig.S5B

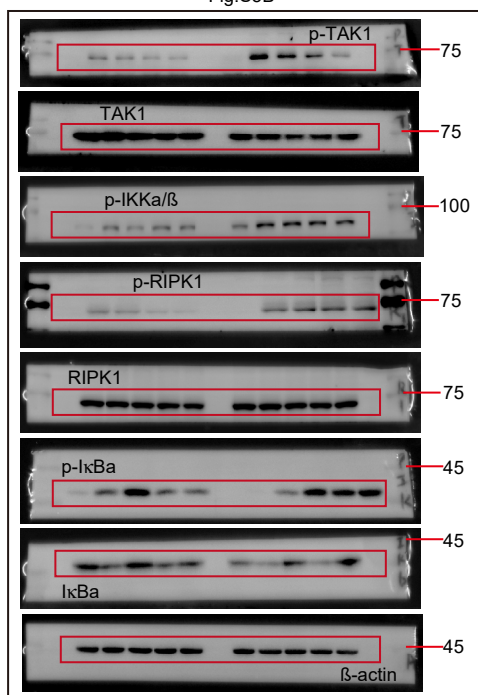

Fig. 6B

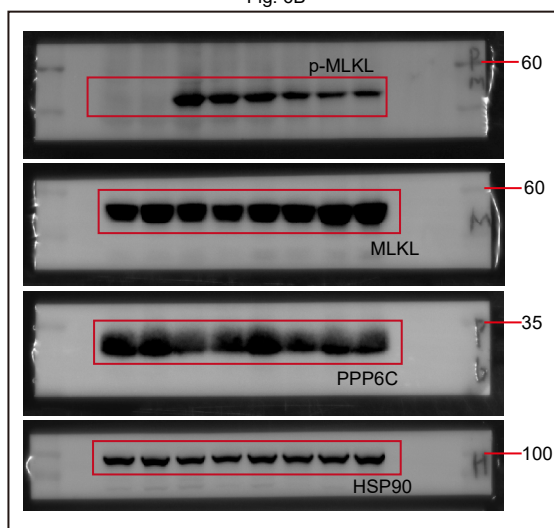

Fig. S6H

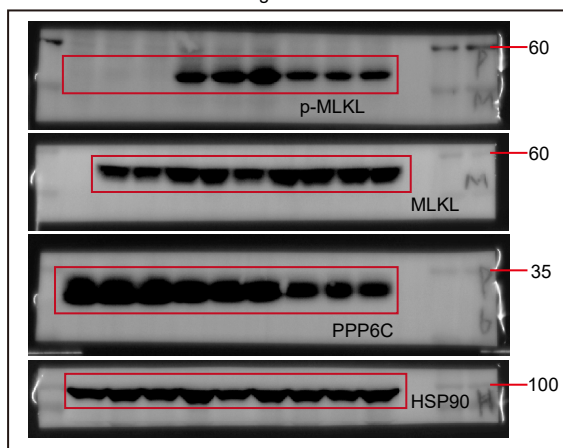

Supplement: 41419_2022_5076_MOESM2_ESM.pdf [file 41419_2022_5076_MOESM2_ESM.pdf]
